# Supplementary material for: Ammonia Bidirectional Flux Model Tailored for Satellite Retrieval Parameter Inversions
Source: Copernicus journal article supplement (doi:10.5194/egusphere-2025-4034), 2025-09-26
Supplement: Supplementary file [file egusphere-2025-4034-AC1-supplement.pdf]

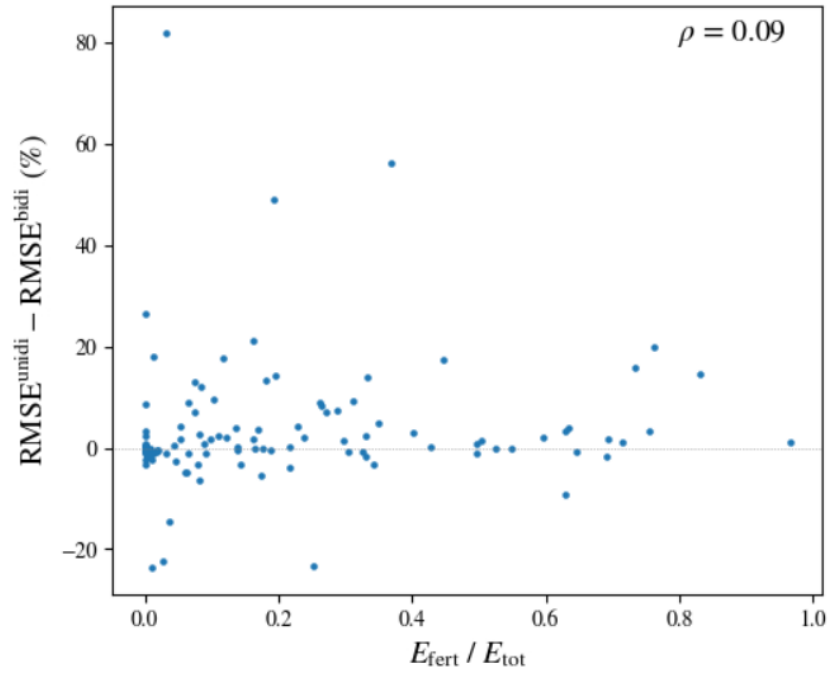

Scatterplot RMSE differences as a function of fraction of fertilizer emissions.

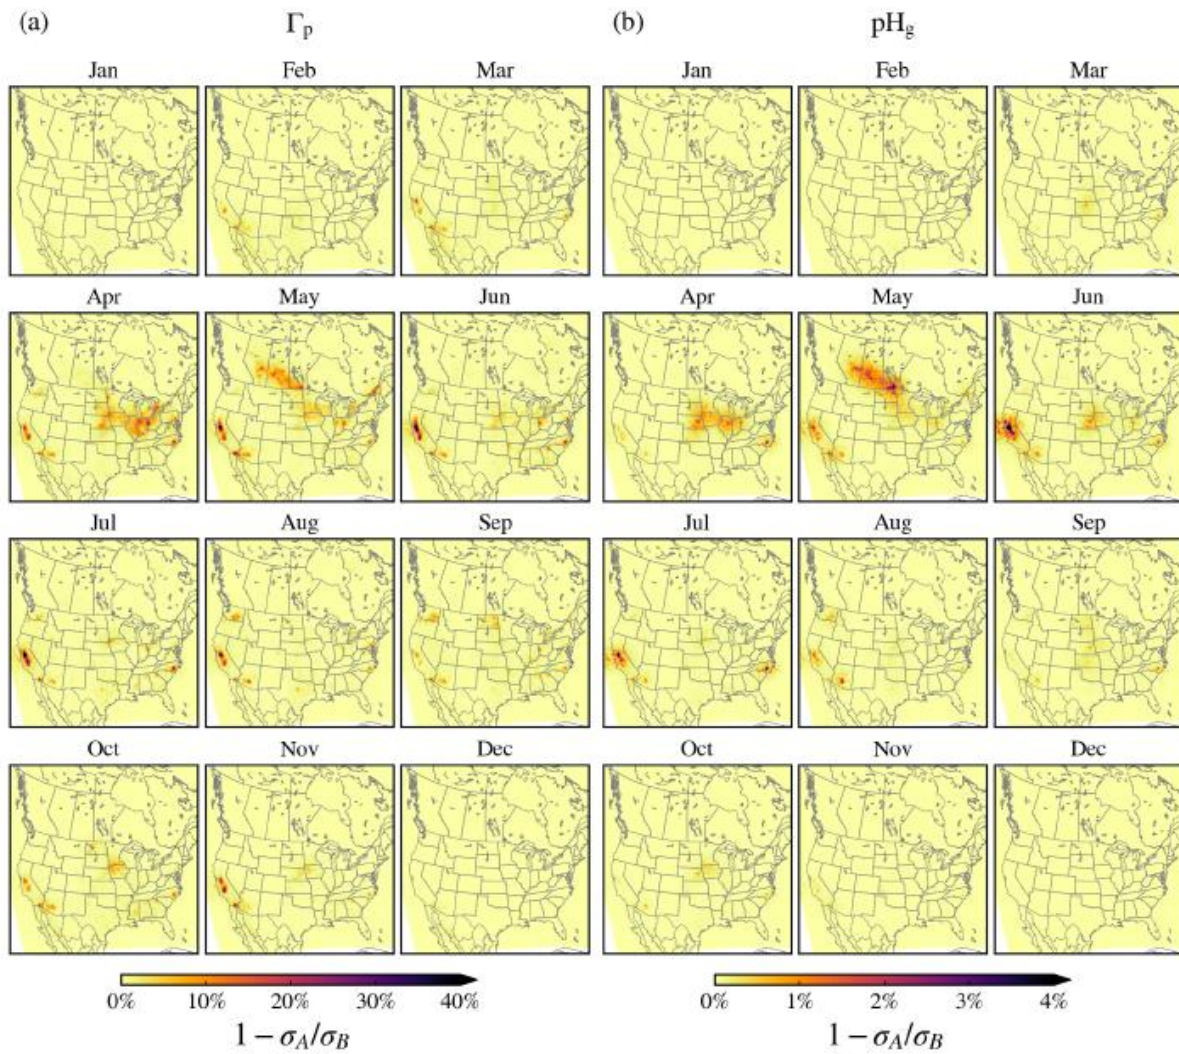

**Figure S5.** Reduction of the analysis (a posterior) uncertainties  $\sigma_A$  relative to the background (a priori) uncertainties  $\sigma_B$  for the inversion parameters (a)  $\Gamma_p$  and (b)  $pH_g$ .
